# Supplementary material
Source: PubMed Central journal article supplement (PMC3736097)
Supplement: NIHMS52671-supplement-01.pdf [file NIHMS52671-supplement-01.pdf]

Table S1. List of germline-expressed genes whose mRNAs affinity-purified with MBP::PUF-8.

| Fold Change | GENE ID    | Expression pattern from NEXTDB <sup>1</sup> | Gene name     | Chr. No. | Expression pattern from Reinke 2004 <sup>2</sup> | Expression pattern from Kim 2001 <sup>3</sup> | RNAi phenotype <sup>4</sup> | SAM rank in FBF target list <sup>5</sup> | Known or predicted biochemical function <sup>4</sup>                                                                            |
|-------------|------------|---------------------------------------------|---------------|----------|--------------------------------------------------|-----------------------------------------------|-----------------------------|------------------------------------------|---------------------------------------------------------------------------------------------------------------------------------|
| 5.35        | W03C9.7    | very strong in adult gonad                  | <i>mex-1</i>  | II       | intrinsic                                        | Mount 7                                       | emb stp                     | 1239                                     | CCCH-type zinc finger protein                                                                                                   |
| 4.43        | F54C9.8    | strong in the middle and proximal gonad     | <i>puf-5</i>  | II       | intrinsic                                        | Mount 7                                       |                             | 1640                                     | Member of PUF family of RNA-binding proteins                                                                                    |
| 3.48        | D1007.7    |                                             | <i>nrd-1</i>  | I        | intrinsic                                        | Mount 5                                       | emb                         | 3878                                     | RNA polymerase II C-terminal domain-binding protein RA4, contains RPR and RRM domains                                           |
| 6.62        | F52E1.1    | very strong in adult gonad                  | <i>pos-1</i>  | V        | oogenesis-enriched                               | mount 7                                       | emb                         | 4590                                     | CCCH-type zinc finger protein                                                                                                   |
| 4.86        | ZC404.8    | no expression                               | <i>spn-4</i>  | V        | oogenesis-enriched                               | mount 7                                       | emb let ste                 | 2127                                     | RRM superfamily RNA-binding protein                                                                                             |
| 3.02        | F23B2.6    |                                             | <i>aly-2</i>  | IV       | oogenesis-enriched                               | mount 7                                       |                             |                                          | Ref / ALY RNA export adaptor family member                                                                                      |
| 3.85        | Y18D10A.17 |                                             | <i>car-1</i>  | I        | oogenesis-enriched                               | mount 11                                      | emb                         | 1983                                     | Putative RNA-binding protein orthologous to budding yeast Scd6p fission yeast Sum2p Drosophila TRAL and human LSM14A and LSM14B |
| 3.67        | R03D7.7    |                                             | <i>nos-1</i>  | II       | oogenesis-enriched                               | mount 7                                       |                             | 1786                                     | Member of the Nanos family RNA-binding protein                                                                                  |
| 9.27        | C27F2.5    | no clear expression                         | <i>vps-22</i> | III      |                                                  | mount 2                                       | let ste age                 | 3039                                     | <i>C. elegans</i> ortholog of the conserved vacuolar protein sorting protein EAP30/SNF8/VPS22                                   |

|       |           |                  |                |     |                           |               |                  |      |                                                                   |
|-------|-----------|------------------|----------------|-----|---------------------------|---------------|------------------|------|-------------------------------------------------------------------|
| 3.22  | F57C2.2   |                  | <i>btb-19</i>  | II  |                           | mount 2       | ste emb          | 4436 | BTB domain protein                                                |
| 3.21  | T13B5.8   | gonad expression | <i>sut-1</i>   | II  | mixed oogenesis + somatic | mount 5       | ste              | 2154 | RNA- and snRNP-binding protein (SUT-1/SL26p)                      |
| 3.79  | Y43E12A.1 |                  | <i>cyb-2.1</i> | IV  | intrinsic                 |               | emb stp          | 906  | Cyclin B and related kinase-activating proteins                   |
| 3.30  | H14E04.5  |                  | <i>cic-1</i>   | III | mixed oogenesis + somatic | mount 11      |                  | 2046 | CDK8 kinase-activating protein cyclin C                           |
| 4.10  | C09H10.6  | strong in gonad  | <i>nasp-1</i>  | II  | oogenesis-enriched        | mount 11      |                  | 1859 | Cell cycle-regulated histone H1-binding protein                   |
| 3.92  | Y44E3B.1a |                  | <i>zip-4</i>   | I   | oogenesis-enriched        | mount 11      |                  | 3116 | Basic region leucine zipper transcription factor                  |
| 3.80  | C38D4.6   |                  | <i>pal-1</i>   | III | oogenesis-enriched        | mount 7       | gro emb          | 3584 | Similar to the homeodomain protein Caudal                         |
| 7.28  | ZK632.9   | faint in gonad   |                | III |                           | mount 2       |                  |      | DNA-binding nuclear protein p8                                    |
| 5.22  | R11D1.10  | no expression    |                | V   |                           | mount 2       |                  | 3205 |                                                                   |
| 10.76 | F22B5.1   | gonad            | <i>evl-20</i>  | II  | intrinsic                 | Mount 2       | emb ste stp      | 1026 | GTP-binding ADP-ribosylation factor-like protein ARL2             |
| 3.49  | B0393.2   |                  | <i>rbg-3</i>   | III | oogenesis-enriched        | mount 7       |                  | 1318 | Ypt/Rab-specific GTPase-activating protein GYP6                   |
| 3.69  | K08F4.2   |                  |                | IV  | oogenesis-enriched        | mount 2 and 5 | maternal sterile |      | RasGAP SH3 binding protein rasputin contains NTF2 and RRM domains |
| 5.42  | F36H1.4b  | faint in gonad   | <i>lin-3</i>   | IV  | oogenesis-enriched        | mount 7 and 8 | ste gro sick     | 17   | Member of the EGF family of peptide growth factors                |
| 7.15  | C14F5.1b  | no expression    | <i>dct-1</i>   | X   |                           | mount 15      |                  |      | Similar to mammalian BNIP3 that ineract with Bcl-2                |
| 4.17  | T21E3.1   | no expression    | <i>egg-4</i>   | I   | oogenesis-enriched        | mount 7       | ste emb let      | 727  | Protein tyrosine phosphatase                                      |
| 4.58  | R12E2.10  |                  | <i>egg-5</i>   | I   | oogenesis-enriched        |               | emb ste          | 727  | Protein tyrosine phosphatase                                      |

|      |           |                                       |               |     |                    |                 |                     |      |                                                                                                                   |
|------|-----------|---------------------------------------|---------------|-----|--------------------|-----------------|---------------------|------|-------------------------------------------------------------------------------------------------------------------|
| 3.34 | F44F4.2   | strong posterior expression           | <i>egg-3</i>  | II  | oogenesis enriched | mount 7 and 6   | emb ste             | 497  | Protein tyrosine phosphatase                                                                                      |
| 5.15 | T12D8.8   | strong in gonad                       | <i>hip-1</i>  | III |                    | mount 16        |                     |      | Hsp70-interacting protein Hip/Transient component of progesterone receptor complexes and an Hsp70-binding protein |
| 7.48 | T10B5.6   | faint in gonad                        | <i>knl-3</i>  | V   | intrinsic          | Mount 11        | emb ste let sick    | 360  | KNL-3 activity is essential for formation of a functional kinetochore                                             |
| 4.79 | F54C8.2   | no                                    | <i>cpa-1</i>  | III | intrinsic          |                 | emb ste let         | 1993 | Homologous to inner kinetochore histone H3 variant CENP-A                                                         |
| 3.64 | F57B10.12 |                                       | <i>mei-2</i>  | I   | oogenesis-enriched | mount 7         | emb mei             | 679  |                                                                                                                   |
| 3.86 | M01E11.6  |                                       | <i>klp-15</i> | I   | oogenesis-enriched | mount 7         | emb him mei         | 38   | Kinesin (KAR3 subfamily)                                                                                          |
| 9.14 | C50F4.7   | whole gonad                           | <i>his-37</i> | V   |                    | mount 6         | emb let ste         |      | Histone H4                                                                                                        |
| 5.46 | D2007.5   | very faint in gonad                   | <i>atg-13</i> | III | herm sex enriched  | Mount 2         |                     | 2315 | Divergent ortholog of the autophagic budding yeast protein Atg13p                                                 |
| 9.07 | T19E7.3   | no expression                         | <i>bec-1</i>  | IV  |                    | mount 11        | let ste emb gro let | 69   | Beclin-like protein                                                                                               |
| 5.19 | ZK593.6   | very strong in gonad + somatic tissue | <i>lgg-2</i>  | IV  |                    | mount 18 and 15 |                     | 104  | Microtubule-associated anchor protein involved in autophagy and membrane trafficking                              |
| 4.29 | CD4.4     | no expression                         | <i>vps-37</i> | V   |                    | mount 18        | emb let ste         | 2265 | Related to yeast Vacuolar Protein Sorting factor                                                                  |
| 9.48 | B0334.4   | no expression                         |               | II  | intrinsic          | Mount 7         | let ste             | 1668 | Protein similar to predicted member of the intramitochondrial sorting protein family                              |
| 8.52 | M03E7.5   | very faint in gonad                   | <i>memb-2</i> | V   | intrinsic          | Mount 7         | emb                 | 3833 | Golgi SNAP receptor complex member                                                                                |
| 8.46 | ZK1098.5  | no expression                         |               | III | intrinsic          | Mount 2         | emb ste             |      | Transport protein particle (TRAPP) complex subunit                                                                |
| 6.85 | C10H11.10 | very faint in                         | <i>kca-1</i>  | I   | intrinsic          | Mount 7         | emb lon             | 12   | Kinesin Cargo Adaptor)                                                                                            |

|       |            |                     |                |     |                    |                |             |      |                                                                                                                                 |
|-------|------------|---------------------|----------------|-----|--------------------|----------------|-------------|------|---------------------------------------------------------------------------------------------------------------------------------|
|       |            | gonad               |                |     |                    |                |             |      |                                                                                                                                 |
| 6.74  | K08H10.9   | no expression       |                | V   |                    | mount 18       |             | 2260 | Transport protein particle (TRAPP) complex subunit                                                                              |
| 6.03  | C01G8.2    | no expression       | <i>cln-3.2</i> | I   |                    | mount 2        |             | 1964 | Predicted small molecule transporter involved in cellular pH homeostasis                                                        |
| 17.51 | Y38F2AR.2  | no expression       | <i>trap-3</i>  | IV  |                    | mount 20       |             | 2452 | Translocon-associated complex TRAP gamma subunit                                                                                |
| 6.49  | Y56A3A.21  | no expression       | <i>trap-4</i>  | III |                    | mount 20       | unc prl     |      | Translocon-associated complex TRAP delta subunit                                                                                |
| 3.29  | F59B2.7    |                     | <i>rab-6.1</i> | III |                    | mount 7        | ste let     | 2498 | Small monomeric Rab GTPase that is most closely related to the Drosophila and mammalian Rab6 GTPases                            |
| 3.67  | F57B10.5   |                     |                | I   |                    | mount 2        |             |      | emp24/gp25L/p24 family of membrane trafficking proteins                                                                         |
| 3.85  | Y47G6A.2   |                     | <i>inx-22</i>  | I   |                    | mount 7        | emb         | 85   | INneXin                                                                                                                         |
| 6.18  | Y74C10AL.2 | no expression       |                | I   |                    | mount 2 and 34 |             | 1361 | Predicted membrane protein                                                                                                      |
| 7.00  | D1022.1    | no expression       | <i>ubc-6</i>   | II  | herm sex enriched  | Mount 5        |             | 1205 | Non-canonical ubiquitin conjugating enzyme 1 <i>ubc-6</i> encodes an E2 ubiquitin-conjugating enzyme                            |
| 14.31 | T01C3.3    | whole gonad         |                | V   | intrinsic          | Mount 7        |             | 1150 | Predicted E3 ubiquitin ligase                                                                                                   |
| 4.63  | R01H2.6    | germline expression | <i>ubc-18</i>  | III | intrinsic          | Mount 2        | ste emb let | 4217 | Ubiquitin-protein ligase                                                                                                        |
| 4.24  | C06A5.8    | somatic + gonad     |                | I   | intrinsic          | Mount 7        |             | 978  | Predicted E3 ubiquitin ligase                                                                                                   |
| 5.73  | ZK858.4    | no expression       | <i>mel-26</i>  | I   | oogenesis-enriched | mount 7        | emb let ste | 1359 | MATH and BTB/POZ domain-containing protein that functions as substrate-specific adaptor of CUL-2-containing E3 ubiquitin ligase |
| 7.68  | Y54E5B.4   | no expression       | <i>ubc-16</i>  | I   |                    | mount 2        |             | 2393 | Ubiquitin conjugating enzyme                                                                                                    |
| 3.39  | F46E10.8   |                     | <i>ubh-1</i>   | V   |                    | mount 2        |             |      | Ubiquitin C-terminal hydrolase UCHL1                                                                                            |

|       |            |                     |               |     |                           |                |         |      |                                                                                                                                |
|-------|------------|---------------------|---------------|-----|---------------------------|----------------|---------|------|--------------------------------------------------------------------------------------------------------------------------------|
| 4.42  | F39B2.2    | no expression       | <i>uev-1</i>  | I   |                           | mount 18       |         | 3832 | Ubiquitin-conjugating enzyme E2                                                                                                |
| 4.89  | Y110A7A.14 | no expression       | <i>pas-3</i>  | I   |                           | Mount 18 and 5 | emb ste |      | 20S proteasome regulatory subunit alpha type PSMA4/PRE9                                                                        |
| 3.64  | C47B2.3a   |                     | <i>tba-2</i>  | I   |                           | mount 20       | emb let | 2415 | Alpha-tubulin                                                                                                                  |
| 4.36  | Y71F9AL.16 | whole gonad         | <i>arx-1</i>  | I   |                           |                | emb     | 2682 | Actin-related protein Arp2/3 complex subunit Arp3                                                                              |
| 3.46  | Y79H2A.6   | gonad expression    | <i>arx-3</i>  | III |                           | mount 5        | ste let | 3728 | Actin-related protein Arp2/3 complex subunit ARPC1/p41-ARC                                                                     |
| 5.75  | C16A3.5    | very faint in gonad |               | III | herm sex enriched         | Mount 2        | emb let |      | NADH:ubiquinone oxidoreductase NDUFB9/B22 subunit                                                                              |
| 7.04  | F23B12.6   | whole body + gonad  | <i>fntb-1</i> | V   | intrinsic                 |                |         | 446  | Beta subunit of Farnesyl Transferase                                                                                           |
| 5.08  | C36B1.7    | gonad expression    | <i>dhfr-1</i> | I   | intrinsic                 | Mount 18       | emb ste | 1437 | Dihydrofolate reductase                                                                                                        |
| 4.94  | F30F8.3    | proximal gonadl     |               | I   | intrinsic                 | Mount 7        |         | 2709 | PDZ domain                                                                                                                     |
| 3.85  | C54G4.6    |                     | <i>dod-18</i> | I   | intrinsic                 | Mount 2        | age     | 2665 | Maf-like protein, required for normal short lifespan                                                                           |
| 3.68  | Y54E2A.3   |                     | <i>tac-1</i>  | II  | intrinsic                 | Mount 5        | emb     | 164  | Transforming acidic coiled-coil (TACC) protein family member                                                                   |
| 3.63  | Y18D10A.20 |                     | <i>pfn-1</i>  | I   | intrinsic                 | Mount 2        |         |      | Profilin                                                                                                                       |
| 3.10  | ZK970.3    |                     | <i>mdt-22</i> | II  | intrinsic                 | Mount 2 and 7  | emb     | 2257 | Surfeit family protein 5                                                                                                       |
| 3.05  | F33G12.4   |                     | <i>lrr-1</i>  | II  | intrinsic                 | Mount 2        | ste let | 2976 | Leucine rich repeat                                                                                                            |
| 3.53  | F43G9.9    |                     | <i>cpn-1</i>  | I   | intrinsic                 | mount 7        |         | 3763 | Calponin homolog more closely related to calponin per se than to its paralogs transgelin (SM22 alpha) or neuronal protein NP25 |
| 10.09 | F56A11.5   | proximal gonad      |               | IV  | mixed oogenesis + somatic | Mount 20       |         |      | Uncharacterized Fe-S protein                                                                                                   |
| 5.18  | R11E3.8    | strong in           | <i>dpf-5</i>  | IV  | mixed                     | Mount 2        |         | 4602 | Dipeptidyl aminopeptidase                                                                                                      |

|       |           |                                     |              |     |                           |          |          |      |                                                                                    |
|-------|-----------|-------------------------------------|--------------|-----|---------------------------|----------|----------|------|------------------------------------------------------------------------------------|
|       |           | gonad                               |              |     | oogenesis + somatic       |          |          |      |                                                                                    |
| 4.16  | T23B12.6  | very faint in gonad                 |              | V   | mixed oogenesis + somatic | Mount 2  |          | 3380 | SETA-binding protein SB1 and related proteins, contains BTB/POZ domain             |
| 3.06  | C37C3.9   |                                     |              | V   | oogenesis-enriched        | mount 7  |          | 1197 | Uncharacterized protein, contains BTB/POZ domain                                   |
| 4.26  | W06B4.1   | no expression                       |              | II  | oogenesis-enriched        | mount 7  |          | 247  | N-Acetylglucosamine kinase                                                         |
| 11.65 | Y75B12B.1 |                                     |              | V   | oogenesis-enriched        | mount 7  |          | 1611 | Probable transposase stabilized by GLD-1                                           |
| 9.56  | B0280.5   | very strong in adult gonad          | <i>cpg-2</i> | III | oogenesis-enriched        | mount 7  |          | 3373 | Protein with six chitin-binding peritrophin-A domains and three mucin-like regions |
| 8.75  | C01G10.7  | very faint in gonad                 |              | V   | oogenesis-enriched        | mount 7  |          | 3860 | Citrate lyase beta subunit                                                         |
| 8.44  | C01G5.5   | no expression                       |              | IV  | oogenesis-enriched        | mount 2  |          |      | Aldo/keto reductase family proteins                                                |
| 8.11  | W01A11.2  | no expression                       |              | V   | oogenesis-enriched        | mount 7  | emb sick | 706  | Acyl-CoA:diacylglycerol acyltransferase (DGAT)                                     |
| 5.37  | M01E11.1  |                                     |              | I   | oogenesis-enriched        | mount 2  |          | 2690 | Farnesyl cysteine-carboxyl methyltransferase                                       |
| 5.08  | C56C10.10 | no expression                       |              | II  | oogenesis-enriched        | mount 2  |          | 28   | Aryl-hydrocarbon receptor-interacting protein                                      |
| 8.57  | K06B9.2   | no expression                       |              | IV  | oogenesis-enriched        | mount 7  | emb ste  | 1203 | Putative UDP-N-acetylglucosamine pyrophosphorylase                                 |
| 4.27  | R10D12.12 | no expression                       |              | V   | oogenesis-enriched        | mount 18 |          | 1311 | Predicted glycosyltransferase                                                      |
| 4.12  | T25E12.5  | transition zone to oocytes in gonad | <i>gyg-2</i> | V   | oogenesis-enriched        | mount 7  |          | 429  | Glycosyl transferase family 8 - glycogenin                                         |
| 4.12  | F26D10.10 | transition                          | <i>gln-5</i> | IV  | oogenesis-                | mount 7  |          | 1212 | Glutamine synthetase                                                               |

|       |           |                            |                 |     |                    |          |             |      |                                                                                                                                                    |
|-------|-----------|----------------------------|-----------------|-----|--------------------|----------|-------------|------|----------------------------------------------------------------------------------------------------------------------------------------------------|
|       |           | zone to oocytes in gonad   |                 |     | enriched           |          |             |      |                                                                                                                                                    |
| 3.36  | C17F4.5   |                            | <i>fbxc-50</i>  | II  | oogenesis enriched | mount 7  | small       | 895  | Protein containing an F-box a motif predicted to mediate protein-protein interactions either with homologs of yeast Skp-1p or with other proteins. |
| 14.66 | Y40B10A.1 | proximal gonad and oocytes | <i>lbp-9</i>    | V   |                    | Mount 3  |             |      | Fatty acid-binding protein FABP                                                                                                                    |
| 3.59  | Y60A3A.18 | gonad                      | <i>skr-1</i>    | V   |                    | mount 0  | emb him     |      | Homolog of yeast Skp1                                                                                                                              |
| 6.60  | C25B8.4   | strong in distal gonad     | <i>clec-266</i> | X   |                    | mount 12 |             | 636  | C-type lectin                                                                                                                                      |
| 5.41  | F57B10.10 | no expression              | <i>dad-1</i>    | I   |                    | mount 18 | emb let gro |      | Defender against cell death protein/oligosaccharyltransferase epsilon subunit                                                                      |
| 3.26  | F25D7.1   |                            | <i>cup-2</i>    | I   |                    | mount 18 | sterile     | 3861 | Predicted membrane protein                                                                                                                         |
| 8.11  | W01A11.1  |                            |                 | V   |                    | mount 2  |             |      | Predicted hydrolases or acyltransferases (alpha/beta hydrolase superfamily)                                                                        |
| 5.49  | F57C9.1b  | no expression              |                 | I   |                    | mount 2  |             | 463  | Pyridoxal/pyridoxine/pyridoxamine kinase                                                                                                           |
| 5.13  | Y47D9A.1b | no                         |                 | I   |                    | mount 2  |             | 1470 | GDP-mannose pyrophosphorylase                                                                                                                      |
| 5.07  | C35D10.6  | gonad                      |                 | III |                    | mount 2  | gro unc     | 3867 | Aldo/keto reductase family proteins                                                                                                                |
| 4.72  | F23H11.9  |                            |                 | III |                    | mount 2  | let ste     |      | CDP-alcohol phosphatidyltransferase/Phosphatidylglycerol -phosphate synthase                                                                       |
| 4.59  | H24K24.3a | gonad                      |                 | V   |                    | mount 2  |             | 4549 | Alcohol dehydrogenase class III                                                                                                                    |
| 4.58  | C52E4.2   | expression not clear       | <i>mif-2</i>    | V   |                    | mount 2  | emb         |      | Macrophage migration inhibitory factor                                                                                                             |
| 4.59  | H24K24.3b |                            |                 | V   |                    | mount 2  |             | 4549 | Alcohol dehydrogenase class III                                                                                                                    |
| 4.04  | K11H3.1b  |                            | <i>gpdh-2</i>   | III |                    | mount 2  |             | 4054 | Glycerol-3-phosphate dehydrogenase/dihydroxyacetone 3-phosphate                                                                                    |

|      |            |                                  |                |     |  |               |         |      |                                                                           |
|------|------------|----------------------------------|----------------|-----|--|---------------|---------|------|---------------------------------------------------------------------------|
|      |            |                                  |                |     |  |               |         |      | reductase                                                                 |
| 3.12 | F31C3.1    |                                  | <i>cyn-5</i>   | I   |  | mount 2       |         |      | Cyclophilin, similar to human cyclophilin B                               |
| 3.01 | C23G10.2b  |                                  |                | III |  | mount 2       |         |      | Putative translation initiation inhibitor UK114/IBM1                      |
| 5.94 | C52E4.1    | gut                              | <i>cpr-1</i>   | V   |  | mount 2 and 8 | age     |      | Cysteine proteinase Cathepsin L                                           |
| 6.43 | Y46G5A.5   | very faint in gonad              | <i>pisy-1</i>  | II  |  | mount 20      | ste let | 87   | Phosphatidylinositol synthase                                             |
| 3.01 | Y106G6D.4  |                                  |                | I   |  | mount 4       |         |      | Glycogen synthase kinase-3                                                |
| 5.16 | Y54E5A.7   | very faint in gonad              |                | I   |  | mount 5       |         |      | SPRY domain-containing proteins                                           |
| 3.22 | C25A1.8    |                                  | <i>clec-87</i> | I   |  | mount 7       |         | 3750 | Putative secreted C-type lectin p                                         |
| 3.19 | Y47G6A.22a |                                  |                | I   |  | mount 2       |         | 3915 | Reductases with broad range of substrate specificities                    |
| 3.56 | F10D11.1   |                                  | <i>sod-2</i>   | I   |  | mount 4       |         |      | Manganese superoxide dismutase                                            |
| 3.30 | K11H3.1a   | no expression                    | <i>gpdh-2</i>  | III |  | mount 2       |         | 4054 | Glycerol-3-phosphate dehydrogenase/dihydroxyacetone 3-phosphate reductase |
| 3.91 | Y37H9A.6   |                                  | <i>ndx-4</i>   | I   |  | mount 2       |         |      | Diadenosine and diphosphoinositol polyphosphate phosphohydrolase          |
| 3.89 | R01B10.4   |                                  |                | V   |  | mount 2       |         | 127  | Predicted membrane protein                                                |
| 3.67 | T02G5.8    |                                  | <i>kat-1</i>   | II  |  | mount 20      |         |      | Acetyl-CoA acetyltransferase                                              |
| 4.41 | ZK829.9    | loop region of gonad and oocytes |                | IV  |  | mount 7       |         | 3612 | Permease of the major facilitator superfamily                             |
| 5.82 | Y82E9BR.14 | very faint in gonad              |                | III |  |               |         | 2970 | Glycolipid transfer protein                                               |
| 4.60 | Y105E8A.2  | strong in gonad                  |                | I   |  |               |         | 4190 | Protein OS-9                                                              |
| 4.11 | R06F6.9    | gonad                            | <i>ech-4</i>   | II  |  | mount 20      |         |      | Enoyl-CoA hydratase/isomerase                                             |



|       |            |                            |        |     |                    |               |             |      |                           |
|-------|------------|----------------------------|--------|-----|--------------------|---------------|-------------|------|---------------------------|
| 3.75  | Y48G8AL.8b |                            | rpl-17 | I   |                    |               | let emb ste |      | 60S ribosomal protein L22 |
| 3.15  | T23B3.1    |                            |        | I   | herm sex enriched  | mount 7       |             |      |                           |
| 3.56  | F52H3.4    |                            |        | II  | inntrinsic         | Mount 7       |             | 594  |                           |
| 15.46 | Y54G9A.5   | no clear expression        |        | II  | intrinsic          | Mount 7       |             | 1735 |                           |
| 9.03  | F32D1.7    | proximal gonad and oocytes |        | V   | intrinsic          | Mount 7       |             | 131  |                           |
| 8.57  | K03H1.7    | no expression              |        | III | intrinsic          | Mount 7       |             | 372  |                           |
| 7.77  | F31E3.6    | just below pharynx         |        | III | intrinsic          | Mount 2       |             |      |                           |
| 7.49  | C33F10.4   | very faint in gonad        |        | II  | intrinsic          | Mount 2       |             |      |                           |
| 5.19  | F43G6.10   | no                         |        | II  | intrinsic          | Mount 7       |             | 472  |                           |
| 3.97  | F13A2.4    |                            |        | V   | intrinsic          | Mount 7       |             |      |                           |
| 3.95  | C29A12.1   |                            |        | V   | intrinsic          | Mount 7       |             | 7    |                           |
| 3.84  | W03C9.2    |                            |        | II  | intrinsic          | Mount 7       |             | 869  |                           |
| 3.20  | ZK858.5    |                            |        | I   | intrinsic          | Mount 2       | spn emb     | 1477 |                           |
| 25.09 | F18A1.7    | no expression              |        | II  | oogenesis-enriched | mount 7       |             | 1801 |                           |
| 14.53 | Y37E11B.3  | no expression              |        | IV  | oogenesis-enriched | mount 2       |             | 1240 |                           |
| 9.54  | W03C9.5    | no expression              |        | II  | oogenesis-enriched | mount 7 and 2 |             |      |                           |
| 9.46  | T24D1.3    | proximal gonad             |        | I   | oogenesis-enriched | mount 7       | emb         | 154  |                           |
| 7.15  | C17E7.4    | very faint in gonad        |        | V   | oogenesis-enriched | mount 7       |             | 3037 |                           |
| 7.00  | Y17G9B.9   | no expression              |        | IV  | oogenesis-enriched | mount 7       | emb         | 313  |                           |

|       |            |                            |               |     |                    |                |                      |      |                                                                                                                             |
|-------|------------|----------------------------|---------------|-----|--------------------|----------------|----------------------|------|-----------------------------------------------------------------------------------------------------------------------------|
| 6.45  | F10D11.2   | probably in gonad          |               | I   | oogenesis-enriched | mount 7        |                      | 4240 |                                                                                                                             |
| 6.39  | W05F2.3    | very strong in adult gonad |               | I   | oogenesis-enriched | mount 7        | ste let rbs          | 1825 |                                                                                                                             |
| 4.68  | F42H10.2   | no expression              |               | III | oogenesis-enriched | mount 7        |                      | 3942 |                                                                                                                             |
| 4.42  | Y62E10A.14 | no expression              |               | IV  | oogenesis-enriched | mount 7        | emb                  | 285  |                                                                                                                             |
| 4.22  | C14B1.2    | no expression              |               | III | oogenesis-enriched | mount 7        |                      | 2377 |                                                                                                                             |
| 4.06  | K03B4.2    | no expression              |               | V   | oogenesis-enriched | mount 2        |                      | 582  |                                                                                                                             |
| 3.59  | Y53C12A.6  |                            |               | II  | oogenesis-enriched | mount 7        | maternal sterile     | 302  |                                                                                                                             |
| 3.29  | K09H9.2    |                            |               | I   | oogenesis-enriched | mount 7        | emb maternal sterile |      |                                                                                                                             |
| 3.14  | C28C12.2   | medial gonad               | <i>mesp-1</i> | IV  | oogenesis-enriched | mount 7        | ste let              | 763  |                                                                                                                             |
| 4.03  | F54D10.5   | somatic expression         |               | II  | oogenesis-enriched | mount 7        |                      | 1004 |                                                                                                                             |
| 3.76  | C17E4.10   |                            |               | I   | oogenesis-enriched | mount 2        |                      | 386  |                                                                                                                             |
| 3.06  | F52A8.1    |                            |               | I   |                    | mount 18 and 1 |                      | 3572 |                                                                                                                             |
| 11.91 | R166.3     | no expression              |               | II  |                    | mount 2        |                      | 26   | orthologous to the human Alport syndrome mental retardation midface hypoplasia and elliptocytosis chromosomal region gene 1 |
| 6.51  | C17E7.9b   | no expression              |               | V   |                    | mount 2        |                      | 3547 |                                                                                                                             |
| 3.34  | F35H10.5   |                            |               | IV  |                    | mount 2        |                      |      |                                                                                                                             |
| 8.98  | F15A4.10   | no                         |               | II  |                    | mount 7        |                      | 4375 |                                                                                                                             |

|      |            |                                        |  |    |  |          |         |      |  |
|------|------------|----------------------------------------|--|----|--|----------|---------|------|--|
| 4.38 | Y57E12AL.6 | no                                     |  | V  |  | mount 18 | ste emb |      |  |
| 3.68 | F48C1.6    |                                        |  | I  |  | mount 20 |         | 442  |  |
| 3.77 | F40F11.3   |                                        |  | IV |  | mount 7  | gro     |      |  |
| 6.26 | Y20F4.4    | very strong in adult pro gonad         |  | I  |  |          |         | 1483 |  |
| 6.04 | Y73E7A.1   | faint in gonad                         |  | I  |  |          |         |      |  |
| 4.28 | T24H7.3    | gonad expression                       |  | II |  |          |         | 2289 |  |
| 4.20 | Y73B6BL.27 | strong in gonad + somatic (not strong) |  | IV |  |          |         |      |  |

**Key for the color codes used:**

|                                                                                     |                                              |                                                                                      |                            |
|-------------------------------------------------------------------------------------|----------------------------------------------|--------------------------------------------------------------------------------------|----------------------------|
|    | RNA-binding proteins                         |    | Cytoskeletal               |
|    | Cell cycle                                   |    | Autophagy                  |
|    | Transcription factors / DNA-binding proteins |    | Metabolic pathways         |
|    | Protein tyrosine phosphatase                 |    | Signalling                 |
|    | Kinetochores and chromosomal                 |    | Ribosomal protein          |
|  | Transporters / membrane                      |  | Heat-shock response        |
|  | Proteosomal                                  |  | Unknown molecular function |

Fold change indicates ratio of hybridization intensities obtained with affinity-purified mRNA (Test) to total mRNA. <sup>1</sup>Expression pattern information from the Nematode Expression Pattern DataBase (NEXTDB) (<http://nematode.lab.nig.ac.jp/db2/index.php>). <sup>2</sup>Expression pattern information from Reinke et al.(Reinke et al., 2004). <sup>3</sup>Expression pattern information from Kim et al (Kim et al., 2001). <sup>4</sup>These informations are annotations found at [www.wormbase.org](http://www.wormbase.org). <sup>5</sup>The FBF SAM ranks are from Kershner and Kimble (Kershner and Kimble, 2010). Blank fields indicate that the corresponding gene has not been ranked on the list of potential FBF

targets. Age – life span abnormal; emb – embryonic lethal; gro – slow growth; him – more number of males among progeny than wild-type; let – larval lethal; lon – longer than wild-type; mei – defective meiosis; prl - paralyzed; rbs – reduced brood size; spn – defective spindle orientation; ste - sterile; stp – sterile progeny; and unc – uncoordinated locomotion.

**Table S2. Sequences of primers used in this study: 1. General primers**

| Name   | Sequence                                                          | Description                                                                                                                                                 |
|--------|-------------------------------------------------------------------|-------------------------------------------------------------------------------------------------------------------------------------------------------------|
| KS1448 | TCTGTGCGACGCCACAGGCATATTTTCAAAT                                   | Forward and reverse primers, respectively for amplifying PUF domain of PUF-8 for cloning in pMAL-c4E to express MBP::PUF-8 fusion protein in <i>E. coli</i> |
| KS1449 | TCTGCGGCCGCTAGTGAGATCCCTGCATATC                                   |                                                                                                                                                             |
| KS1461 | TGTGTGTGTGCTATGTACATGTGTGTGTGCCCTATAGTGAG<br>TCGTATTAAGA          | Template for in vitro transcription of NRE-containing RNA. Reverse complementary sequence of T7 promoter is at the 3' end.                                  |
| KS2096 | GCATTAGCGGCCGCGAAATTAATACGACTCACTATAGGGA<br>GA(T) <sub>21</sub> V | Primer for first strand cDNA synthesis to incorporate T7 promoter sequence                                                                                  |
| KS2496 | ACTCTAATACGACTCACTATAG                                            | Sequence of T7 promoter                                                                                                                                     |
| KS2952 | GTTAATCTCATCAATTTCTGCTG                                           | Reverse PCR primer at 506 bp downstream of <i>pal-1</i> STOP codon                                                                                          |
| KS2983 | AACGTCGTCGGCAGAGATTC                                              | Forward PCR primer at 350 bp upstream of <i>pal-1</i> STOP codon                                                                                            |
| KS2995 | TCTGGGCCCCGTGACAAACAGAAGATTCGGC                                   | Forward PCR primer at 20 bp upstream of <i>pal-1</i> STOP codon                                                                                             |
| KS2997 | TCTGGGCCCCGTTAATCTCATCAATTTCTGCTG                                 | Same as KS2952, but contains Bsp 120I site                                                                                                                  |

**Table S3. Sequences of primers used in this study: 2. Primers for testing translational activity of 3'UTRs**

| <b>Name</b> | <b>Sequence</b>               | <b>Description</b>                   |
|-------------|-------------------------------|--------------------------------------|
| KS2745      | TCTGGGCCCTTGGAACCCAGAGCCGCTTG | Forward PCR primer for C06A5.8i      |
| KS2746      | TCTGGGCCCAAAATACACTGGGCGGTCC  | Reverse PCR primer for C06A5.8       |
| KS2747      | TCTGGGCCCAAAAGACGGTTCCGAGTTG  | Forward PCR primer for D1022.1       |
| KS2748      | TCTGGGCCCAACAGGTTTCTCGAAGATA  | Reverse PCR primer for D1022.1       |
| KS2749      | TCTGGGCCCATTCAGCAACCGGCAGAGG  | Forward PCR primer for F39B2.2       |
| KS2750      | TCTGGGCCCTTGTGGCTGGTGCTGATGGT | Reverse PCR primer for F39B2.2       |
| KS2753      | TCTGGGCCCGCGCCAAGAGCTCAGATCTA | Forward PCR primer for R01H2.6       |
| KS2754      | TCTGGGCCCAACTAAGCCAGTTCCTCC   | Reverse PCR primer for R01H2.6       |
| KS2755      | TCTGGGCCCTGCTCCCATTCTACATTG   | Forward PCR primer for T01C3.3       |
| KS2756      | TCTGGGCCCGCTGTGAGGAAAGAAGTGA  | Reverse PCR primer for T01C3.3       |
| KS2759      | TCTGGGCCAGGACCCCTCCAATCTTCTT  | Forward PCR primer for <i>ubc-16</i> |
| KS2760      | TCTGGGCCCTCAAATGTGGGTACTGTAGC | Reverse PCR primer for <i>ubc-16</i> |
| KS2650      | TCTGGGCCGTTTCGACGAATGCATGCTG  | Forward PCR primer for <i>kca-1</i>  |
| KS2651      | TCTGGGCCGAACGAACAAGTCTTCCAGC  | Reverse PCR primer for <i>kca-1</i>  |
| KS2652      | TCTGGGCCGTTGGAAGTCCCAAGTCAC   | Forward PCR primer for F30F8.3       |
| KS2653      | TCTGGGCCGAGAGCATGTCAAGATCTC   | Reverse PCR primer for F30F8.3       |

|        |                                 |                                     |
|--------|---------------------------------|-------------------------------------|
| KS2654 | TCTGGGCCCCCGGAGCCAGATCTTGACTA   | Forward PCR primer for <i>hip-1</i> |
| KS2655 | TCTGGGCCCCGACTCCGCCCAATTCTTGGCC | Reverse PCR primer for <i>hip-1</i> |
| KS2656 | TCTGGGCCCCGGCTCACGAGCGGCCAGATC  | Forward PCR primer for Y54E5A.7     |
| KS2657 | TCTGGGCCCCTGTAGTAGTACTGTAGAGG   | Reverse PCR primer for Y54E5A.7     |
| KS2658 | TCTGGGCCCCGGCTGACTCTCGTGTCACCTT | Forward PCR primer for C56C10.10    |
| KS2659 | TCTGGGCCCCTCCAGATGTTCTTCCATG    | Reverse PCR primer for C56C10.10    |
| KS3092 | TCTGGGCCCCGACAACCAAGGCAATACTGC  | Forward PCR primer for <i>car-1</i> |
| KS3093 | TCTGGGCCCCGGTTACTGTTGGAAAGGCTG  | Reverse PCR primer for <i>car-1</i> |
| KS3094 | TCTGGGCCCTAATCTGGATTCCTCCGTCC   | Forward PCR primer for <i>mex-1</i> |
| KS3095 | TCTGGGCCCCTCATGATCTCATGGTCCCG   | Reverse PCR primer for <i>mex-1</i> |

**Table S4. Sequences of primers used in this study: 3. Primers for mutation analysis of *pal-1* 3'UTR**

| Name   | Sequence                                                  | Description                                                                                                           |
|--------|-----------------------------------------------------------|-----------------------------------------------------------------------------------------------------------------------|
| KS2984 | TCTGAAGACCTGTGTGTGTGTCTTTGTAAGTAGATGAG<br>TACT            | Reverse primer for the upstream fragment for PRE 1<br>mutation                                                        |
| KS2985 | TCTGAAGACCTACACACACACCTGGGAATTTTCATATT<br>TTTCTAG         | Forward primer for the downstream fragment for PRE<br>1 mutation                                                      |
| KS2986 | TCTGAAGACCTGTGTGTGTGTGTTCTAGAAAAATATGAA<br>AATTCCC        | Reverse primer for the upstream fragment for PRE 2<br>mutation                                                        |
| KS2987 | TCTGAAGACCTACACACACACTTATATTTTACATTTC<br>TCTCGC           | Forward primer for the downstream fragment for PRE<br>2 mutation                                                      |
| KS2988 | TCTGAAGACCTGTGTGTGTGGAAGAAATTATATAAAA<br>GTGTG            | Reverse primer for the upstream fragment for PRE 3<br>mutation                                                        |
| KS2989 | TCTGAAGACCTACACACACCATTCTCTCACATCAGAAT<br>ATTCC           | Forward primer for the downstream fragment for PRE<br>3 mutation                                                      |
| KS3069 | TCTGAAGACCTGTGTGTGTGTGTGTGTGCAGAAGG<br>AATGATCGGAAAG      | Reverse primer for the upstream fragment for PRE 4<br>mutation                                                        |
| KS3070 | TCTGAAGACCTACACCATTCTCTAATGAATTATTCCCT                    | Forward primer for the downstream fragment for PRE<br>4 mutation                                                      |
| KS3355 | TTCCCAGAATTTTGTACATTTTCTTTGTTTCTCCCTAT<br>AGTGAGTCGTATTA  | T7 promoter-containing template for in vitro<br>transcription of the 29-nt PRE 1 RNA with wild-type<br>PRE 1 sequence |
| KS3356 | TTCCCAGAATTGTAGATGTTTTTCTTTGTTTCTCCCTAT<br>AGTGAGTCGTATTA | Same as KS3355, but with mutant PRE 1 sequence                                                                        |
| KS3357 | GAGAATGGGAGATGGGACAGGAAGAAATTTTCTCCCT<br>ATAGTGAGTCGTATTA | T7 promoter-containing template for in vitro<br>transcription of the 29-nt PRE 3 RNA with wild-type<br>PRE 3 sequence |



**Table S5. Sequences of primers used in this study: 4. Primers used in RT-PCR validation of microarray results.**

| Name   | Sequence              | Gene ID   | Gene name       | Fold enrichment with MBP::PUF-8 |
|--------|-----------------------|-----------|-----------------|---------------------------------|
| KS2363 | GAGACGGAGAGAAAGTTGGC  | T01C3.3   |                 | 14.3                            |
| KS2364 | GATTGCAAGGGCGATCCTCG  |           |                 |                                 |
| KS2365 | ATTCTCCGTAAGCAACGTGC  | F22B5.1   | <i>evl-20</i>   | 10.8                            |
| KS2366 | TTGGACCAGTCGATCACCAG  |           |                 |                                 |
| KS2367 | ATGCCCCTCATCAAAGTGCA  | F13G3.9   | <i>mif-3</i>    | 10.1                            |
| KS2368 | GCAAGAAACGCAATGCCTAG  |           |                 |                                 |
| KS2369 | ATCTGGAGAGGCTTCTGGTG  | B0280.5   | <i>cpg-2</i>    | 9.6                             |
| KS2370 | ATGGCATTGAAGCAGGGTCG  |           |                 |                                 |
| KS2371 | ATCTGCACGAGCTCTTCTGG  | C01G10.7  |                 | 8.8                             |
| KS2372 | TGAACTCTCTCCACGAGCTG  |           |                 |                                 |
| KS2373 | CGACTGGAATCACAACCTGGG | M03E7.5   | <i>gosr-2.2</i> | 8.5                             |
| KS2374 | GCAGAACATGAATATCAGGC  |           |                 |                                 |
| KS2375 | CTGGCAGTCCAGATACTGTG  | C33F10.4  |                 | 7.5                             |
| KS2376 | TCAGTTGAATGCCGCAAGCA  |           |                 |                                 |
| KS2377 | ATGACTCGACGCAACTGGAG  | T10B5.6   | <i>knl-3</i>    | 7.5                             |
| KS2378 | AGCATCGATTGCTCGAAGC   |           |                 |                                 |
| KS2379 | CTCCAAAATCCAATGCTGCC  | C17E7.4   |                 | 7.1                             |
| KS2380 | AGTATTGGAAGCCTGTGGGC  |           |                 |                                 |
| KS2381 | CGTCTTGCTGATATGGAAGG  | F23B12.6  | <i>fntb-1</i>   | 7.0                             |
| KS2382 | GAAGTGAAGAACTCCTTGGC  |           |                 |                                 |
| KS2383 | CTACCAGCTGGCCTATGTCG  | C10H11.10 | <i>kca-1</i>    | 6.8                             |
| KS2384 | AACTTCCGACATCGGATTCC  |           |                 |                                 |
| KS2385 | CATCAAGATCAGGGTCCAAC  | F10D11.2  |                 | 6.4                             |
| KS2386 | CGCAGAGTATCGCTCAGATG  |           |                 |                                 |
| KS2387 | ATTCAGAACACCCACGTACC  | W05F2.3   |                 | 6.4                             |
| KS2388 | GATATCCTCGTCGCTGTTCG  |           |                 |                                 |
| KS2389 | CGCTGAGCCATAGACAGAAG  | C16A3.5   |                 | 5.8                             |
| KS2390 | TTGGAAACAGTTGGGGCAGC  |           |                 |                                 |
| KS2391 | TCCCAGAGAAGCTGCTCCTAG | D2007.5   | <i>atg-13</i>   | 5.5                             |
| KS2392 | CATCGGAGAACGAATTGACG  |           |                 |                                 |
| KS2393 | TGCGTGTGCTCAAGCAGAG   | F35A5.8b  | <i>erp-1</i>    | 5.4                             |
| KS2394 | GCTGACAGGCAATTTTCCGC  |           |                 |                                 |
| KS2395 | GATCAGGCCGACTATGAAGC  | W03C9.7   | <i>mex-1</i>    | 5.4                             |
| KS2396 | TCTTCGTGAGCATCGTCGTC  |           |                 |                                 |
| KS2397 | CGCAGTTCTACCGTCTTGG   | R11E3.8   | <i>dpf-5</i>    | 5.2                             |

|        |                         |            |                 |     |
|--------|-------------------------|------------|-----------------|-----|
| KS2398 | TTGCATAGTCGGCCTCAACG    |            |                 |     |
| KS2399 | CATGCAGTATTTTCGCGTCTG   | C36B1.7    | <i>dhfr-1</i>   | 5.1 |
| KS2400 | GTGGTTCTCGACAACCTTCC    |            |                 |     |
| KS2401 | GCTGATCGCTGCGGGATAAC    | F30F8.3    |                 | 4.9 |
| KS2402 | CTAGAGACGCGTGACTIONTGGG |            |                 |     |
| KS2403 | CGACACGGCGTCTTCAGAAG    | R01H2.6    | <i>ubc-18</i>   | 4.6 |
| KS2404 | GCGTGCTTTTCGAGTGTGCTC   |            |                 |     |
| KS2405 | AGTGGCACGCAACTGCTTCC    | F54C9.8    | <i>puf-5</i>    | 4.4 |
| KS2406 | GCACTGATGTCCATGAGTGG    |            |                 |     |
| KS2407 | CCAACGTCAACACTACCACG    | C25B8.4    | <i>clec-266</i> | 6.6 |
| KS2408 | TCCGTTTTCTCTCGCAGATCG   |            |                 |     |
| KS2409 | TCAGAAGGCCGATATCGAGC    | T12D8.8    |                 | 5.2 |
| KS2410 | TGTTGTGGGACAGAAGCTCC    |            |                 |     |
| KS2411 | ATGAGCGGAAATCGGGGAGG    | ZK593.6    | <i>lgg-2</i>    | 5.2 |
| KS2412 | TCCAAATGCTGGTTGAGACG    |            |                 |     |
| KS2413 | ATGTCGTCGACTGCTGAAGA    | ZK632.9    |                 | 7.3 |
| KS2414 | TTTGCCCTCTCCGTTGCTGGC   |            |                 |     |
| KS2415 | TTGCTCATTCACTGGCCTGG    | C35D10.6   |                 | 5.1 |
| KS2416 | AAACCACTACGCGAGGATCC    |            |                 |     |
| KS2417 | CTCGGTGCAGTCGGATTGGC    | H24K24.3a  |                 | 4.6 |
| KS2418 | CGCAGACTCTCTCCCTTGTG    |            |                 |     |
| KS2419 | GGCGCTCTGCAAGTTCTACC    | Y46G5A.5   | <i>pisy-1</i>   | 6.4 |
| KS2420 | CATTGGGCCTTCTGAGCAGC    |            |                 |     |
| KS2421 | GGGAATATTGCTCCAGAAGC    | Y54E5A.7   |                 | 5.2 |
| KS2422 | CGCTGCTGACGAATAATCTC    |            |                 |     |
| KS2423 | ATGTCTGGACGTGGAAAGGG    | C50F4.7    | <i>his-37</i>   | 9.1 |
| KS2424 | TATCCACCGAATCCGTAGAG    |            |                 |     |
| KS2425 | GGAGGAGGAGATGAGTAGTC    | Y73E7A.1   |                 | 6.0 |
| KS2426 | GAGCCAGAAGACGAGCGTTG    |            |                 |     |
| KS2427 | GTTTCAGCCTCGTTCGGAAGG   | Y82E9BR.14 |                 | 5.8 |
| KS2428 | CATCCGGCGTATCGAGCTTC    |            |                 |     |
| KS2429 | ATCCGATCCCAAAGTCGTCC    | T01C8.1b   | <i>aak-2</i>    | 4.4 |
| KS2430 | GCCAGTGTCCAATCAATGC     |            |                 |     |
| KS2431 | CTTTCGGACAACATCTCGTG    | Y110A7A.14 | <i>pas-3</i>    | 4.9 |
| KS2432 | TCTCAGCAGTCTCAGCTTCC    |            |                 |     |
| KS2433 | ATCAATGGCCCAGCCGTAGG    | R06F6.9    | <i>ech-4</i>    | 4.1 |
| KS2434 | CAATCGCTTGGTGACACTCC    |            |                 |     |
| KS2435 | CTTCATCTTCAGCATCATGG    | Y73B6BL.27 |                 | 4.2 |
| KS2436 | GATTTTCCCATGATTGAGCC    |            |                 |     |

|        |                        |            |               |      |
|--------|------------------------|------------|---------------|------|
| KS2437 | AGCCGAGCAGAGCTATGAGG   | Y71F9AL.16 | <i>arx-1</i>  | 4.4  |
| KS2438 | ATCGGCTTCGGCTTCAACCG   |            |               |      |
| KS2439 | ATGCCTCTGTGAGCGAGACG   | T24H7.3    |               | 4.3  |
| KS2440 | CATCGGAATCGCTTCTTTCC   |            |               |      |
| KS2441 | ATGGAGTCGTGTCTCAACCC   | F18A1.7    |               | 25.1 |
| KS2442 | GCCTTGAAATCGCCGTTGCG   |            |               |      |
| KS2443 | AATCATGGCTTGCAAGTGTG   | K11G9.6    | <i>mtl-1</i>  | 24.6 |
| KS2444 | AATGAGCCGCAGCAGTTCCC   |            |               |      |
| KS2445 | CGAATTGTAGCGTAGCAGCC   | Y54G9A.5   |               | 15.5 |
| KS2446 | CGCAGAAGGTCGAGCGATTC   |            |               |      |
| KS2447 | TGTCCGCCCAACTGCAGAAG   | F15A4.10   |               | 9.0  |
| KS2448 | GGTCATCATCGGAAGAGTCG   |            |               |      |
| KS2449 | AATATGGGCACCCGCTTGC    | ZK1098.5   |               | 8.5  |
| KS2450 | ATCTTCACCGGCAGGTAGGC   |            |               |      |
| KS2451 | CATGCGCAATTGTCATTGGC   | W01A11.2   |               | 8.1  |
| KS2452 | TCACTGGAAGATGAGATGAG   |            |               |      |
| KS2453 | AAGAGCGCCAGCGTTTAGCC   | D1022.1    | <i>ubc-6</i>  | 7.0  |
| KS2454 | TCGACAAGGAAGCGACGAGC   |            |               |      |
| KS2455 | AAACTCATCATCGCCTTCGC   | F41F3.3    |               | 6.3  |
| KS2456 | TTTCTTCCGGCGTAAGCTCC   |            |               |      |
| KS2457 | ACGCTCAGTACAGTGACTCG   | R102.5a    |               | 6.1  |
| KS2458 | AGCTCGAGAAGTCTTCCAGC   |            |               |      |
| KS2459 | TGTTCTGGCTGCTCGATCTC   | ZK858.4    | <i>mel-26</i> | 5.7  |
| KS2460 | CAGATGGAGGTGGTACAATG   |            |               |      |
| KS2461 | CGAATTCGTCTTCACAGCAC   | M01E11.1   |               | 5.4  |
| KS2462 | CATGGTCTTTGATACCCACG   |            |               |      |
| KS2463 | GAAGAGGAGATGAAGCTTCC   | R07E5.7    |               | 5.3  |
| KS2464 | GCTCTGAGTTTGTCTTCGGC   |            |               |      |
| KS2465 | TCATCCCACTTGTCCAGAGC   | R11.4      |               | 5.3  |
| KS2466 | TCAGCAAAGTTTCATGGCTC   |            |               |      |
| KS2467 | ATGGGCGGATGCTTTTCCCG   | F43G6.10   |               | 5.2  |
| KS2468 | CTACTGTTGATGATCCAACCTG |            |               |      |
| KS2469 | ATGTCTCGCCTTGCTATCCT   | Y5F2A.2    | <i>ttr-17</i> | 5.1  |
| KS2470 | TTGCAGATGGTCTTCTCTCC   |            |               |      |
| KS2471 | GAAGCCATTGATGCGTATCG   | C56C10.10  |               | 5.1  |
| KS2472 | TAAGTGACACGAGAGTCAGC   |            |               |      |
| KS2473 | CTTGTGATTACTCCCACGG    | F54C8.2    | <i>cpar-1</i> | 4.8  |
| KS2474 | CACGTCTGTAGTCGTGAGTG   |            |               |      |
| KS2475 | ATTCGGAGCTTGGAGCCGAG   | K06B9.2    |               | 4.7  |

|        |                      |          |              |     |
|--------|----------------------|----------|--------------|-----|
| KS2476 | ATGATCGGATTCCAAGGCAC |          |              |     |
| KS2477 | AGTTGTGAGAATGAGCGTCG | F42H10.2 |              | 4.7 |
| KS2478 | TATCATTGTCACCGGTACCG |          |              |     |
| KS2479 | ATAAGCATCGTCTGGCGCTG | W06B4.1  |              | 4.3 |
| KS2480 | AGCAGAATGCGACACGATCG |          |              |     |
| KS2481 | TCTCTGCCGCTGCCGATATC | T25E12.5 | <i>gyg-2</i> | 4.1 |
| KS2482 | GCCATGCTCTCGTCAAGTGC |          |              |     |

In all cases, the first and the second sequences represent the forward and reverse PCR primers, respectively.

**Table S6. Potential common targets of PUF-8 and FBF**

| Gene name  | PRE                                                      | FBE                                                                    | Fold enrichment with MBP::PUF-8 | SAM rank in FBF target list |
|------------|----------------------------------------------------------|------------------------------------------------------------------------|---------------------------------|-----------------------------|
| C29A12.1   | None                                                     | uguacc <u>au</u>                                                       | 9.5                             | 7                           |
| C10H11.10  | <u>uguaaaau</u><br>uguc <u>aa</u> au                     | <u>uguaaaau</u><br>ugu <u>ac</u> uau                                   | 3.7                             | 12                          |
| F36H1.4b   | ugu <u>au</u> au                                         | ugug <u>cu</u> au<br>uguuuuau<br>ugu <u>uc</u> uau<br>ugu <u>au</u> au | 5.4                             | 17                          |
| R166.3     | <u>uguaaaau</u><br>ugu <u>au</u> au<br>ugu <u>aaa</u> a  | <u>uguaaaau</u><br>ugu <u>au</u> uau<br>ugu <u>au</u> au               | 5.5                             | 26                          |
| C56C10.10  | ugu <u>ac</u> au                                         | ugu <u>ac</u> uau                                                      | 9.0                             | 28                          |
| M01E11.6   | <u>uguaaaau</u>                                          | <u>uguaaaau</u>                                                        | 4.0                             | 38                          |
| U19E7.3    | ugu <u>aa</u> ua                                         | ugu <u>ac</u> au                                                       | 3.7                             | 69                          |
| Y47G6A.2   | None                                                     | ugu <u>uc</u> uau                                                      | 3.6                             | 85                          |
| Y46G5A.5   | <u>uguaaaau</u>                                          | <u>uguaaaau</u>                                                        | 4.7                             | 87                          |
| ZK593.6    | <u>uguaaaau</u><br>ugu <u>aa</u> ua<br>ugu <u>au</u> gua | <u>uguaaaau</u><br>ugu <u>uc</u> cau                                   | 4.9                             | 104                         |
| R01B10.4   | ugu <u>ac</u> gau                                        | uguuuuau<br>ugug <u>ca</u> au<br>ugu <u>uc</u> cau                     | 3.6                             | 127                         |
| F32D1.7    | ugu <u>au</u> ua                                         | ugug <u>cu</u> au                                                      | 3.4                             | 131                         |
| U24D1.3    | ugu <u>aa</u> uu<br><u>uguaaaau</u><br>ugu <u>au</u> ua  | ugug <u>cc</u> au<br><u>uguaaaau</u>                                   | 6.4                             | 154                         |
| Y54E2A.3   | <u>uguaaaau</u>                                          | <u>uguaaaau</u>                                                        | 10.7                            | 164                         |
| W06B4.1    | ugu <u>au</u> uu                                         | ugug <u>uc</u> au                                                      | 3.4                             | 247                         |
| Y62E10A.14 | ugu <u>ac</u> ua<br>ugu <u>au</u> ua<br>ugu <u>au</u> uu | ugu <u>au</u> uau                                                      | 5.2                             | 285                         |
| Y53C12A.6  | ugu <u>ca</u> au                                         | ugu <u>au</u> uau<br>ugug <u>ua</u> au                                 | 4.3                             | 302                         |
| Y17G9B.9   | ugu <u>au</u> ua<br>ugu <u>au</u> uu                     | ugu <u>au</u> uau<br>uguuuuau                                          | 6.3                             | 313                         |

PRE – UGUMHRDW, where M is A or C, H is A, U, or C, R is A or G, D is A, U, or G, and W is A or T (Opperman et al., 2005); FBE – UGUDHHAU, where D is A, U, or G and H is A, U, or C (Bernstein et al., 2005; Kershner and Kimble, 2010). Highlighted sequences match both PRE and FBE.

**Table S7. *C. elegans* strains used in this study**

| <b>3'UTR fusions</b>    |                                                                             |                                             |                                              |                               |                        |
|-------------------------|-----------------------------------------------------------------------------|---------------------------------------------|----------------------------------------------|-------------------------------|------------------------|
| <b>Fusions</b>          | <b>Strain</b>                                                               | <b>Transgene</b>                            | <b>Genotype</b>                              | <b>Lines</b>                  | <b>Reference</b>       |
| <i>hip-1</i>            | IT258                                                                       | <i>pie-1 prom:gfp:H2B:hip-1 3'utr</i>       | <i>unc-119(ed3) III; kpIs(pPA1)</i>          | 3                             | This study             |
| <i>mex-1</i>            | IT258                                                                       | <i>pie-1 prom:gfp:H2B:mex-1 3'utr</i>       | <i>unc-119(ed3) III; kpIs(pPA2)</i>          | 3                             | This study             |
| <i>pal-1</i>            | JH2236                                                                      | <i>pie-1 prom:gfp:H2B:pal-1 3'utr</i>       | <i>unc-119(ed3) III; axIs1624</i>            | -                             | (Merritt et al., 2008) |
| <i>spn-4</i>            | JH2311                                                                      | <i>pie-1 prom:gfp:H2B:spn-4 3'utr</i>       | <i>unc-119(ed3) III; axIs1668</i>            | -                             | (Merritt et al., 2008) |
| <i>puf-5</i>            | JH2418                                                                      | <i>pie-1 prom:gfp:H2B:puf-5 3'utr</i>       | <i>unc-119(ed3) III; axIs1721</i>            | -                             | (Merritt et al., 2008) |
| <i>pos-1</i>            | JH2427                                                                      | <i>pie-1 prom:gfp:H2B:pos-1 3'utr</i>       | <i>unc-119(ed3) III; axIs1751</i>            | -                             | (Merritt et al., 2008) |
| <i>unc-6</i>            | IT258                                                                       | <i>pie-1 prom:gfp:H2B:unc-6 3'utr</i>       | <i>unc-119(ed3) III; kpIs(pPA3)</i>          | 3                             | This study             |
| <i>unc-16</i>           | IT258                                                                       | <i>pie-1 prom:gfp:H2B:unc-16 3'utr</i>      | <i>unc-119(ed3) III; kpIs(pMP20)</i>         | 3                             | This study             |
| <i>D1022.1</i>          | IT260                                                                       | <i>pie-1 prom:gfp:H2B:D1022.1 3'utr</i>     | <i>unc-119(ed3) III; kpIs(pMP21)</i>         | 4                             | This study             |
| <i>F30F8.3</i>          | IT258                                                                       | <i>pie-1 prom:gfp:H2B:F30F8.3 3'utr</i>     | <i>unc-119(ed3) III; kpIs(pPA4)</i>          | 3                             | This study             |
| <i>F39B2.2</i>          | IT261                                                                       | <i>pie-1 prom:gfp:H2B:F39B2.2 3'utr</i>     | <i>unc-119(ed3) III; kpIs(pMP22)</i>         | 3                             | This study             |
| <i>R01H2.6</i>          | IT262                                                                       | <i>pie-1 prom:gfp:H2B:R01H2.6 3'utr</i>     | <i>unc-119(ed3) III; kpIs(pMP23)</i>         | 2                             | This study             |
| <i>T01C3.3</i>          | IT264                                                                       | <i>pie-1 prom:gfp:H2B:T01C3.3 3'utr</i>     | <i>unc-119(ed3) III; kpIs(pMP24)</i>         | 4                             | This study             |
| <i>C06A5.8</i>          | IT266                                                                       | <i>pie-1 prom:gfp:H2B:C06A5.8 3'utr</i>     | <i>unc-119(ed3) III; kpIs(pMP25)</i>         | 5                             | This study             |
| <i>pal-1 PRE-1</i>      | IT314                                                                       | <i>pie-1 prom:gfp:H2B:pal-1 PRE-1 3'utr</i> | <i>unc-119(ed3) III; kpIs(pMP27)</i>         | 3                             | This study             |
| <i>pal-1 PRE-2</i>      | IT316                                                                       | <i>pie-1 prom:gfp:H2B:pal-1 PRE-2 3'utr</i> | <i>unc-119(ed3) III; kpIs(pMP28)</i>         | 4                             | This study             |
| <i>pal-1 PRE-3</i>      | IT318                                                                       | <i>pie-1 prom:gfp:H2B:pal-1 PRE-3 3'utr</i> | <i>unc-119(ed3) III; kpIs(pMP29)</i>         | 3                             | This study             |
| <i>pal-1 PRE-4</i>      | IT300                                                                       | <i>pie-1 prom:gfp:H2B:pal-1 PRE-4 3'utr</i> | <i>unc-119(ed3) III; kpIs(pMP26)</i>         | 4                             | This study             |
| <b>ORF fusions</b>      |                                                                             |                                             |                                              |                               |                        |
| <b>Fusions</b>          | <b>Strain</b>                                                               | <b>Transgene</b>                            | <b>Genotype</b>                              | <b>Lines</b>                  | <b>Reference</b>       |
| <i>pal-1</i>            | JH2013                                                                      | <i>pie-1 prom:gfp:pal-1 ORF:pal-13'utr</i>  | <i>unc-119(ed3) III; axIs1460</i>            | -                             | (Merritt et al., 2008) |
| <i>ify-1</i>            | IT233                                                                       | <i>pie-1 prom:gfp:ify-1 ORF:ify-1 3'utr</i> | <i>unc-119(ed3) III; kpIs(pMP16)</i>         | 2                             | This study             |
| <b>Promoter fusions</b> |                                                                             |                                             |                                              |                               |                        |
| <b>Fusions</b>          | <b>Strain</b>                                                               | <b>Transgene</b>                            | <b>Genotype</b>                              | <b>Reference</b>              |                        |
| <i>hlh-1</i>            | RW10097                                                                     | <i>hlh-1(3.3kb)::HIS-24::mCherry</i>        | <i>unc-119(ed3) III; zuls178V; stIs10088</i> | Murray et al., 2008           |                        |
| <i>hlh-1</i>            | RW10112                                                                     | <i>hlh-1(3.3kb)::HIS-24::mCherry</i>        | <i>unc-119(ed3) III; stIs10026; st10089</i>  | Murray et al., 2008           |                        |
| <i>unc-119</i>          | DP132                                                                       | <i>unc-119::GFP</i>                         | <i>edIs6 IV</i>                              | Ciosk et al., 2006            |                        |
| <b>Other strains</b>    |                                                                             |                                             |                                              |                               |                        |
| <b>Strain</b>           | <b>Genotype</b>                                                             |                                             |                                              | <b>References</b>             |                        |
| IT60                    | <i>puf-8(zh17) unc-4(e120)/mnC1 II</i>                                      |                                             |                                              | Ariz et al., 2009             |                        |
| JH1500                  | <i>puf-8(ok302) unc-4(e120)/mnC1 II</i>                                     |                                             |                                              | Subramaniam and Seydoux, 2003 |                        |
| IT273                   | <i>puf-8(ok302) unc-4(e120)/mnC1 II; axIs1624(gfp:h2b:pal-1 3'utr)</i>      |                                             |                                              | This study                    |                        |
| IT274                   | <i>puf-8(ok302) unc-4(e120)/mnC1 II; axIs1460(gfp:pal-1ORF:pal-1 3'utr)</i> |                                             |                                              | This study                    |                        |

```

1  GUGACAAACA GAAGAUUCGG CUAUAAGUAC UCAUCUACUU ACAAAGAAAA
51 UGUACAAAAA UUCUGGGAU UUUCAUAUUU UUCUAGAAUA UUGUACACAU
101 UUUAUAUAUU UUUACAUUUC UCUCGCUUGA AUACGGUUAA AUUCACACUU
151 UUUAUAUAUU UCUUCUUGUC CCAUUCUCCA UUCUCUCACA UCAGAAUAUU
201 CUAAUCAUCA CUGCCCUAA CAUAUAUAUA UAUAUAUUUA UAACUUUCCG
251 AUCAUCCUU CUGCUUUGUA AACUAAUCCA AUCAUUCUCU AAUGAAUUAU
301 UCCCUAAUAU AGAGCUUCUU UAUUUAUUGU GAUUUCUUGU UUCUUACCCU
351 UCUCAAGGUU UAGGAAAAG UUUAGGUCCC CAUUUGUUAU GUAUUUACUU
401 CCCACUCUGA ACGGAUCCAU UUUGAACAUG UUUUCUAUUU UUUGGAAAAG
451 UUUAGAGAAU UCUUUGCUUU UCUCACAUAU CUUGAUUGCA UAUUUUUUAU
501 AACAAAACAA UGAAACAAUU UGAAGAAUU UACAGCAGAA AUUGAUGAGA
551 UUAAC

```

**Fig. S1. Sequences downstream of PAL-1 coding region.** The 3' UTR region (GenBank accession#NM\_001026039) is underlined. PAL-1 stop codon is shown in red; highlighted regions are: blue – the four PUF-8 recognition elements; yellow – GLD-1 recognition element; green – MEX-3 recognition elements (Mootz et al., 2004; Pagano et al., 2009). Bases 1-279 and 278-555 correspond to Region 1 and Region 2 RNAs, respectively, used in gel shift assays described in Fig. 5.

## Supplementary references

- Bernstein, D., Hook, B., Hajarnavis, A., Opperman, L., Wickens, M., 2005. Binding specificity and mRNA targets of a *C. elegans* PUF protein, FBF-1. *RNA* 11, 447-458.
- Kershner, A. M., Kimble, J., 2010. Genome-wide analysis of mRNA targets for *Caenorhabditis elegans* FBF, a conserved stem cell regulator. *Proc. Natl. Acad. Sci. U. S. A.* 107, 3936-3941.
- Kim, S. K., Lund, J., Kiraly, M., Duke, K., Jiang, M., Stuart, J. M., Eizinger, A., Wylie, B. N., Davidson, G. S., 2001. A gene expression map for *Caenorhabditis elegans*. *Science* 293, 2087-2092.
- Mootz, D., Ho, D. M., Hunter, C. P., 2004. The STAR/Maxi-KH domain protein GLD-1 mediates a developmental switch in the translational control of *C. elegans* PAL-1. *Development* 131, 3263-3272.
- Opperman, L., Hook, B., DeFino, M., Bernstein, D. S., Wickens, M., 2005. A single spacer nucleotide determines the specificities of two mRNA regulatory proteins. *Nat. Struct. Mol. Biol.* 12, 945-951.
- Pagano, J. M., Farley, B. M., Essien, K. I., Ryder, S. P., 2009. RNA recognition by the embryonic cell fate determinant and germline totipotency factor MEX-3. *Proc. Natl. Acad. Sci. U. S. A.* 106, 20252-20257.
- Reinke, V., Gil, I. S., Ward, S., Kazmer, K., 2004. Genome-wide germline-enriched and sex-biased expression profiles in *Caenorhabditis elegans*. *Development* 131, 311-323.
